# Supplementary material for: A Combined Proteomics and Mendelian Randomization Approach to Investigate the Effects of Aspirin-Targeted Proteins on Colorectal Cancer
Source: Oxford University Press journal article supplement (doi:10.1158/1055-9965.epi-20-1176), 2021-01-28
Supplement: 10559965epi201176-sup-248865_2_supp_6721137_qjqz9b.xlsx [file 10559965epi201176-sup-248865_2_supp_6721137_qjqz9b.xlsx]

## Sheet: S1-proteome
Protein	Gene name	2mM vs control			4mM vs control
		Fold change	Count	Variability (%)	Fold change	Count	Variability (%)
cDNA, FLJ93255, highly similar to Homo sapiens solute carrier family 7 (cationic amino acidtransporter, y+ system), member 1 (SLC7A1), mRNA OS=Homo sapiens PE=2 SV=1 - [B2R728_HUMAN]	SLCA1	1.46	3	14.5	1.5	3	25
Heterogeneous nuclear ribonucleoproteins A2/B1 OS=Homo sapiens GN=HNRNPA2B1 PE=1 SV=2 - [ROA2_HUMAN]	HNRNPA2B1	0.71	44	13.9	0.6	42	13.7
Sterol 26-hydroxylase, mitochondrial OS=Homo sapiens GN=CYP27A1 PE=1 SV=1 - [CP27A_HUMAN]	CYP27A1	0.71	2	7.2	0.49	2	6.9
cDNA FLJ37836 fis, clone BRSSN2010587, weakly similar to Homo sapiens MDN1, midasin homolog (yeast) (MDN1), mRNA OS=Homo sapiens PE=2 SV=1 - [B3KT81_HUMAN]	-	0.71	2	5.2	0.67	2	11.9
Multidrug resistance associated protein OS=Homo sapiens GN=MRP3 PE=2 SV=1 - [Q96QA9_HUMAN]	MRP3	0.71	5	26.7	0.7	5	65.5
Pleiotropic regulator 1 (Fragment) OS=Homo sapiens GN=PLRG1 PE=4 SV=1 - [H0YA24_HUMAN]	PLRG1	0.71	2	22.9	0.49	2	13.3
Dihydropyrimidinase-related protein 2 OS=Homo sapiens GN=DPYSL2 PE=1 SV=1 - [DPYL2_HUMAN]	DPYSL2	0.71	3	9.8	0.49	3	4
cDNA FLJ10654 fis, clone NT2RP2005901, highly similar to FAST kinase domains-containing protein 2 OS=Homo sapiens PE=2 SV=1 - [B3KMB8_HUMAN]	FASTKD2	0.71	2	42.7	0.56	3	63
cDNA FLJ78157 OS=Homo sapiens PE=2 SV=1 - [A8K2J6_HUMAN]	-	0.71	3	28.2	0.66	3	22.9
ARF GTPase-activating protein GIT1 OS=Homo sapiens GN=GIT1 PE=4 SV=1 - [J3QRU8_HUMAN]	GIT1	0.71	2	2.7	0.62	2	2.2
UPF0554 protein C2orf43 OS=Homo sapiens GN=C2orf43 PE=1 SV=1 - [CB043_HUMAN]	C2orf43	0.71	2	12	0.71	2	24.9
Alpha-methyl-acyl-CoA racemase IIAs OS=Homo sapiens PE=2 SV=1 - [Q6VRU3_HUMAN]	AMACR	0.71	2	12	0.67	2	0.4
cDNA FLJ56541, highly similar to Ubiquilin-2 OS=Homo sapiens PE=2 SV=1 - [B4DZF1_HUMAN]	UBQLN2	0.7	3	30	0.46	2	88.7
39S ribosomal protein L47, mitochondrial OS=Homo sapiens GN=MRPL47 PE=1 SV=2 - [RM47_HUMAN]	MRPL47	0.7	3	3.6	0.68	3	47.5
Palmitoyl-protein thioesterase 1 OS=Homo sapiens GN=PPT1 PE=1 SV=1 - [PPT1_HUMAN]	PPT1	0.7	3	10.7	0.61	3	22
cDNA FLJ59967 OS=Homo sapiens PE=2 SV=1 - [B4DS67_HUMAN]	-	0.7	2	6.7	0.67	2	3.8
cDNA FLJ54048, highly similar to 55 kDa erythrocyte membrane protein (p55) OS=Homo sapiens PE=2 SV=1 - [B4E325_HUMAN]	MPP1	0.7	2	19.8	0.46	2	6.1
cDNA FLJ37346 fis, clone BRAMY2021310, highly similar to Transcriptional repressor p66 beta OS=Homo sapiens PE=2 SV=1 - [B3KSZ4_HUMAN]	GATAD2B	0.7	2	12.1	0.51	2	7.2
Hephaestin (Fragment) OS=Homo sapiens GN=HEPH PE=2 SV=1 - [Q5JZ08_HUMAN]	HEPH	0.7	6	25.1	0.65	6	26.2
Oxysterol-binding protein (Fragment) OS=Homo sapiens GN=OSBPL8 PE=3 SV=1 - [F8VUA7_HUMAN]	OSBPL8	0.7	2	3.6	0.63	2	15.3
Putative uncharacterized protein DKFZp686K06216 (Fragment) OS=Homo sapiens GN=DKFZp686K06216 PE=2 SV=1 - [Q6MZF3_HUMAN]	DKFZp686K06216	0.69	2	17.3	0.54	2	4.7
Golgin subfamily A member 2 OS=Homo sapiens GN=GOLGA2 PE=1 SV=3 - [GOGA2_HUMAN]	GOLGA2	0.69	3	23.4	0.44	3	8.7
Uridine-cytidine kinase 2 OS=Homo sapiens GN=UCK2 PE=2 SV=1 - [B4DGD3_HUMAN]	UCK2	0.69	2	0.2	0.43	2	4.4
POLDIP3 protein (Fragment) OS=Homo sapiens GN=POLDIP3 PE=2 SV=2 - [Q96DI9_HUMAN]	POLDIP3	0.69	3	4	0.57	3	10.6
cDNA FLJ38173 fis, clone FCBBF1000053, highly similar to HYDROXYMETHYLGLUTARYL-COA SYNTHASE, CYTOPLASMIC OS=Homo sapiens PE=2 SV=1 - [Q8N995_HUMAN]	HMGCS1	0.69	17	9.5	0.59	17	17
cDNA FLJ75871, highly similar to Homo sapiens staufen, RNA binding protein (STAU), transcript variant T3, mRNA OS=Homo sapiens PE=2 SV=1 - [A8K622_HUMAN]	STAU	0.69	7	3.6	0.68	7	12
Small nuclear ribonucleoprotein F OS=Homo sapiens GN=SNRPF PE=1 SV=1 - [RUXF_HUMAN]	SNRPF	0.68	3	5.8	0.65	3	7.1
Uncharacterized protein C7orf50 (Fragment) OS=Homo sapiens GN=C7orf50 PE=4 SV=1 - [C9JQV0_HUMAN]	C7orf50	0.68	4	9.2	0.51	4	29.5
Protein BUD31 homolog OS=Homo sapiens GN=BUD31 PE=4 SV=1 - [C9JNV2_HUMAN]	BUD31	0.68	2	27.2	0.52	2	17
MKI67 FHA domain-interacting nucleolar phosphoprotein OS=Homo sapiens GN=MKI67IP PE=1 SV=1 - [MK67I_HUMAN]	MKI67IP	0.68	2	96.5	0.48	2	0.3
cDNA FLJ12454 fis, clone NT2RM1000555, highly similar to UNR PROTEIN OS=Homo sapiens PE=2 SV=1 - [Q9GZV0_HUMAN]	UNR	0.68	10	16.6	0.62	10	17.3
UBX domain-containing protein 1 (Fragment) OS=Homo sapiens GN=UBXN1 PE=4 SV=1 - [E9PJ81_HUMAN]	UBXN1	0.68	3	21.9	0.7	3	50.4
PTGFRN protein (Fragment) OS=Homo sapiens GN=PTGFRN PE=2 SV=1 - [Q1WWL2_HUMAN]	PTGFRN	0.68	5	8.1	0.59	5	26.2
Protein FAM134C OS=Homo sapiens GN=FAM134C PE=1 SV=1 - [F134C_HUMAN]	FAM134C	0.68	2	39.7	0.71	2	3.7
Lysosome-associated membrane glycoprotein 2 OS=Homo sapiens GN=LAMP2 PE=2 SV=1 - [B7Z2R9_HUMAN]	LAMP2	0.68	7	8.7	0.61	7	12.5
Cytochrome c oxidase protein 20 homolog OS=Homo sapiens GN=COX20 PE=1 SV=2 - [COX20_HUMAN]	COX20	0.68	2	0.9	0.68	2	7.1
Flotillin 1 variant (Fragment) OS=Homo sapiens PE=2 SV=1 - [Q53HQ0_HUMAN]	FLOT1	0.67	6	5.3	0.71	7	39
Uncharacterized protein (Fragment) OS=Homo sapiens PE=3 SV=1 - [H7C469_HUMAN]	-	0.67	11	16.4	0.68	10	12.8
U2 small nuclear ribonucleoprotein B'' OS=Homo sapiens GN=SNRPB2 PE=1 SV=1 - [RU2B_HUMAN]	SNRPB2	0.67	2	17	0.68	2	13.3
RNA 3'-terminal phosphate cyclase-like protein OS=Homo sapiens GN=RCL1 PE=1 SV=3 - [RCL1_HUMAN]	RCL1	0.67	4	55.8	0.25	4	42.5
CD151 antigen OS=Homo sapiens GN=CD151 PE=4 SV=1 - [E9PL82_HUMAN]	CD151	0.67	2	14.4	0.62	2	7.7
cDNA FLJ90454 fis, clone NT2RP3001560, highly similar to Cleft lip and palate transmembrane protein 1 OS=Homo sapiens PE=2 SV=1 - [B3KQH2_HUMAN]	CLPTM1	0.67	5	8.9	0.56	5	7.4
Thioredoxin domain-containing protein 9 OS=Homo sapiens GN=TXNDC9 PE=4 SV=1 - [F8WBV5_HUMAN]	TXNDC9	0.67	2	6.1	0.64	2	12.3
Biogenesis of lysosome-related organelles complex 1 subunit 3 (Fragment) OS=Homo sapiens GN=BLOC1S3 PE=4 SV=1 - [K7EN58_HUMAN]	BLOC1S3	0.67	2	40.9	0.45	2	62.2
cDNA FLJ52523, highly similar to Arfaptin-2 OS=Homo sapiens PE=2 SV=1 - [B4DX86_HUMAN]	ARFIP2	0.67	3	0.6	0.69	3	3.2
CCR4-NOT transcription complex subunit 1 OS=Homo sapiens GN=CNOT1 PE=1 SV=2 - [CNOT1_HUMAN]	CNOT1	0.67	5	11	0.44	5	36.5
U5 small nuclear ribonucleoprotein 40 kDa protein OS=Homo sapiens GN=SNRNP40 PE=1 SV=1 - [SNR40_HUMAN]	SNRNP40	0.66	2	15.7	0.6	3	13.6
Desmoglein-2 OS=Homo sapiens GN=DSG2 PE=1 SV=2 - [DSG2_HUMAN]	DSG2	0.66	4	7.3	0.51	3	84.3
Probable palmitoyltransferase ZDHHC20 OS=Homo sapiens GN=ZDHHC20 PE=2 SV=1 - [B4DRN8_HUMAN]	ZDHHC20	0.66	2	3.5	0.65	2	4.7
Dimethyladenosine transferase 2, mitochondrial OS=Homo sapiens GN=TFB2M PE=1 SV=1 - [TFB2M_HUMAN]	TFB2M	0.66	2	10.7	0.56	2	27.5
cDNA FLJ56163, moderately similar to Mus musculus sushi, von Willebrand factor type A, EGF and pentraxin domain containing 1, mRNA OS=Homo sapiens PE=2 SV=1 - [B4DWM4_HUMAN]	SVEP1	0.66	3	15.1	0.68	2	32.8
Golgi membrane protein 1 OS=Homo sapiens GN=GOLM1 PE=1 SV=1 - [GOLM1_HUMAN]	GOLM1	0.65	7	10.2	0.35	7	24.5
Mitochondrial import inner membrane translocase subunit Tim23 OS=Homo sapiens GN=TIMM23 PE=1 SV=1 - [TIM23_HUMAN]	TIMM23	0.65	2	29.8	0.68	2	30.8
UV excision repair protein RAD23 homolog A OS=Homo sapiens GN=RAD23A PE=4 SV=1 - [K7ESE3_HUMAN]	RAD23A	0.65	3	18.4	0.63	3	15.2
Junction plakoglobin OS=Homo sapiens GN=JUP PE=1 SV=3 - [PLAK_HUMAN]	JUP	0.65	9	22	0.33	7	28.6
Claudin-3 OS=Homo sapiens GN=CLDN3 PE=1 SV=1 - [CLD3_HUMAN]	CLDN3	0.65	4	1.5	0.56	3	14.7
NADH dehydrogenase [ubiquinone] 1 alpha subcomplex subunit 4 OS=Homo sapiens GN=NDUFA4 PE=1 SV=1 - [NDUA4_HUMAN]	NDUFA4	0.65	3	17.6	0.36	3	33.7
cDNA FLJ46429 fis, clone THYMU3014372, highly similar to DNA replication licensing factor MCM2 OS=Homo sapiens PE=2 SV=1 - [B3KXZ4_HUMAN]	MCM2	0.65	21	13.1	0.61	19	17.8
Phosphatidate phosphatase LPIN1 OS=Homo sapiens GN=LPIN1 PE=2 SV=1 - [B4DET9_HUMAN]	LPIN1	0.65	2	7.6	0.64	2	5.5
Fragile X mental retardation syndrome-related protein 1 OS=Homo sapiens GN=FXR1 PE=2 SV=1 - [B4DXZ6_HUMAN]	FXR1	0.65	2	27.5	0.5	2	45.6
Glutamate--cysteine ligase regulatory subunit OS=Homo sapiens GN=GCLM PE=1 SV=1 - [GSH0_HUMAN]	GCLM	0.64	3	7.3	0.33	3	15.6
Sister chromatid cohesion protein PDS5 homolog A OS=Homo sapiens GN=PDS5A PE=1 SV=1 - [PDS5A_HUMAN]	PDS5A	0.64	3	12.9	0.55	3	13.9
Histone acetyltransferase type B catalytic subunit OS=Homo sapiens GN=HAT1 PE=1 SV=1 - [HAT1_HUMAN]	HAT1	0.64	2	11.5	0.47	2	2.2
Cation-independent mannose-6-phosphate receptor OS=Homo sapiens GN=IGF2R PE=1 SV=3 - [MPRI_HUMAN]	IGF2R	0.64	5	19.6	0.53	5	16.5
Beta-2-microglobulin form pI 5.3 (Fragment) OS=Homo sapiens GN=B2M PE=3 SV=1 - [H0YLF3_HUMAN]	B2M	0.64	3	2	0.53	3	0.2
cDNA, FLJ93378, highly similar to Homo sapiens MCM3 minichromosome maintenance deficient 3 (S. cerevisiae) (MCM3), mRNA OS=Homo sapiens PE=2 SV=1 - [B2R7C5_HUMAN]	MCM3	0.64	18	13.5	0.6	19	16.6
Solute carrier family 22 member 18 OS=Homo sapiens GN=SLC22A18 PE=4 SV=1 - [E9PRM7_HUMAN]	SLC22A18	0.64	2	23.7	0.67	2	4.4
Trans-golgi network protein 2, isoform CRA_a OS=Homo sapiens GN=TGOLN2 PE=2 SV=1 - [B2R686_HUMAN]	TGOLN2	0.64	2	29.4	0.55	2	32.3
Creatine kinase B-type OS=Homo sapiens GN=CKB PE=1 SV=1 - [KCRB_HUMAN]	CKB	0.63	4	25.1	0.65	3	1.7
Syndecan-1 OS=Homo sapiens GN=SDC1 PE=1 SV=3 - [SDC1_HUMAN]	SDC1	0.63	3	7.6	0.37	3	42.5
Integrin-linked kinase associated phosphatase OS=Homo sapiens GN=ILKAP3 PE=2 SV=1 - [F8SNU7_HUMAN]	ILKAP3	0.63	2	26.4	0.71	2	11.6
Dihydrofolate reductase OS=Homo sapiens GN=DHFR PE=1 SV=2 - [DYR_HUMAN]	DHFR	0.63	3	21.5	0.31	3	18.1
Serine/threonine-protein phosphatase (Fragment) OS=Homo sapiens GN=PPP4C PE=3 SV=1 - [H3BTA2_HUMAN]	PPP4C	0.63	3	21.2	0.66	3	16
cDNA FLJ14980 fis, clone Y79AA1000181, highly similar to Homo sapiens CGI-01 protein mRNA OS=Homo sapiens PE=2 SV=1 - [B3KNM8_HUMAN]	CGI-01	0.63	4	45.7	0.48	3	5.9
cDNA, FLJ93645, highly similar to Homo sapiens chromatin assembly factor 1, subunit B (p60) (CHAF1B),mRNA OS=Homo sapiens PE=2 SV=1 - [B2R7X3_HUMAN]	CHAF1B	0.62	2	24.8	0.64	2	5.8
cDNA FLJ76072, highly similar to Homo sapiens GIPC PDZ domain containing family, member 1 (GIPC1), transcript variant 1, mRNA OS=Homo sapiens PE=2 SV=1 - [A8K2I7_HUMAN]	GIPC1	0.62	3	25.1	0.25	3	33.5
Prolow-density lipoprotein receptor-related protein 1 OS=Homo sapiens GN=LRP1 PE=1 SV=2 - [LRP1_HUMAN]	LRP1	0.62	3	26	0.49	3	50.1
PNKP protein OS=Homo sapiens PE=2 SV=2 - [Q9BUL2_HUMAN]	PNKP	0.62	2	1.7	0.53	2	3.6
SWI/SNF-related matrix-associated actin-dependent regulator of chromatin subfamily D member 2 OS=Homo sapiens GN=SMARCD2 PE=4 SV=1 - [J3KMX2_HUMAN]	SMARCD2	0.61	2	14.2	0.64	2	25.6
NADH dehydrogenase [ubiquinone] 1 alpha subcomplex subunit 6 OS=Homo sapiens GN=NDUFA6 PE=1 SV=3 - [NDUA6_HUMAN]	NDUFA6	0.61	2	7.6	0.44	2	10.7
Kunitz-type protease inhibitor 1 OS=Homo sapiens GN=SPINT1 PE=4 SV=1 - [F5H877_HUMAN]	SPINT1	0.61	3	12.3	0.44	3	3.2
cDNA FLJ54365, highly similar to DNA replication licensing factor MCM4 OS=Homo sapiens PE=2 SV=1 - [B4DLA6_HUMAN]	MCM4	0.61	10	16.7	0.67	10	17.9
Lymphoid specific helicase variant9 OS=Homo sapiens GN=HELLS PE=2 SV=1 - [Q6I7N8_HUMAN]	HELLS	0.61	2	5.5	0.3	2	19.3
MHC class I antigen (Fragment) OS=Homo sapiens GN=HLA-B PE=3 SV=1 - [B7VU68_HUMAN]	HLA-B	0.61	2	56.9	0.4	2	12.6
Fatty acid desaturase 2 OS=Homo sapiens GN=FADS2 PE=1 SV=1 - [FADS2_HUMAN]	FADS2	0.61	2	5.2	0.26	2	28.8
Non-structural maintenance of chromosomes element 1 homolog (Fragment) OS=Homo sapiens GN=NSMCE1 PE=4 SV=1 - [I3L1I3_HUMAN]	NSMCE1	0.6	2	45.8	0.7	2	30.5
Solute carrier family 12 member 2 OS=Homo sapiens GN=SLC12A2 PE=1 SV=1 - [S12A2_HUMAN]	SLC12A2	0.6	31	8.8	0.57	29	13.8
cDNA FLJ53478, highly similar to Galectin-3-binding protein OS=Homo sapiens PE=2 SV=1 - [B4DVE1_HUMAN]	LGALS3	0.6	54	42.3	0.58	55	83.6
Protein syndesmos (Fragment) OS=Homo sapiens GN=NUDT16L1 PE=4 SV=1 - [K7EIN2_HUMAN]	NUDT16L1	0.59	2	12.1	0.59	2	11.4
Putative uncharacterized protein MCM6 (Fragment) OS=Homo sapiens GN=MCM6 PE=2 SV=1 - [Q4ZG57_HUMAN]	MCM6	0.59	25	10.1	0.65	25	7.6
Importin subunit alpha OS=Homo sapiens PE=2 SV=1 - [A8K7D9_HUMAN]	-	0.59	10	8.9	0.46	9	2
DNA replication licensing factor MCM5 OS=Homo sapiens GN=MCM5 PE=1 SV=5 - [MCM5_HUMAN]	MCM5	0.59	19	19.4	0.62	20	17.4
Ubiquitin-conjugating enzyme E2 R2 OS=Homo sapiens GN=UBE2R2 PE=1 SV=1 - [UB2R2_HUMAN]	UBE2R2	0.59	2	34.6	0.45	2	38.1
Beta adrenergic receptor kinase 1 variant (Fragment) OS=Homo sapiens PE=2 SV=1 - [Q59F73_HUMAN]	GRK2	0.59	2	8.7	0.64	2	4.8
28S ribosomal protein S5, mitochondrial OS=Homo sapiens GN=MRPS5 PE=1 SV=2 - [RT05_HUMAN]	MRPS5	0.56	2	6.5	0.51	2	44.1
Grancalcin (Fragment) OS=Homo sapiens GN=GCA PE=4 SV=1 - [H7C2Z6_HUMAN]	GCA	0.56	2	65.9	0.67	2	19
E3 ubiquitin-protein ligase UBR5 OS=Homo sapiens GN=UBR5 PE=4 SV=1 - [E7EMW7_HUMAN]	UBR5	0.56	3	3.6	0.31	3	6.9
Transporter (Fragment) OS=Homo sapiens GN=SLC6A6 PE=3 SV=1 - [C9JPV1_HUMAN]	SLC6A6	0.56	2	0.4	0.5	2	7.4
NADH dehydrogenase [ubiquinone] 1 beta subcomplex subunit 4 OS=Homo sapiens GN=NDUFB4 PE=1 SV=3 - [NDUB4_HUMAN]	NDUFB4	0.56	3	30	0.48	3	5.3
Nox1 NAD(P)H-oxidase subunit OS=Homo sapiens GN=NOX1 PE=2 SV=1 - [Q8TCT3_HUMAN]	NOX1	0.55	5	20.7	0.53	5	7.7
MHC class I antigen (Fragment) OS=Homo sapiens GN=HLA-A PE=3 SV=1 - [E5BBI6_HUMAN]	HLA-A	0.55	2	9.6	0.64	2	0.6
cDNA FLJ78441, highly similar to Homo sapiens nucleolar and spindle associated protein 1 (NUSAP1),mRNA OS=Homo sapiens PE=2 SV=1 - [A8K4B4_HUMAN]	NUSAP1	0.54	2	4.7	0.62	2	16.6
DNA polymerase delta subunit 2 (Fragment) OS=Homo sapiens GN=POLD2 PE=4 SV=1 - [C9JHC7_HUMAN]	POLD2	0.54	2	16.4	0.35	2	5.1
cDNA FLJ52285, highly similar to Vesicular integral-membrane protein VIP36 OS=Homo sapiens PE=2 SV=1 - [B4DWN1_HUMAN]	VIP36	0.54	12	16.2	0.48	12	38
Eukaryotic translation initiation factor 1b OS=Homo sapiens GN=EIF1B PE=1 SV=2 - [EIF1B_HUMAN]	EIF1B	0.53	2	5.6	0.29	2	42.2
Heat shock protein beta-1 OS=Homo sapiens GN=HSPB1 PE=1 SV=2 - [HSPB1_HUMAN]	HSPB1	0.52	7	7.9	0.28	7	8.1
cDNA FLJ31217 fis, clone KIDNE2004095, highly similar to RAC-beta serine/threonine-protein kinase (EC 2.7.11.1) OS=Homo sapiens PE=2 SV=1 - [B3KP61_HUMAN]	AKT2	0.5	2	20.8	0.35	2	16.6
Protein-methionine sulfoxide oxidase MICAL1 OS=Homo sapiens GN=MICAL1 PE=1 SV=2 - [MICA1_HUMAN]	MICAL1	0.5	2	26.1	0.56	3	30.9
cDNA, FLJ94888, highly similar to Homo sapiens suppression of tumorigenicity 14 (colon carcinoma, matriptase, epithin) (ST14), mRNA OS=Homo sapiens PE=2 SV=1 - [B2RAF9_HUMAN]	ST14	0.49	3	25.9	0.35	3	22.5
Methylcrotonoyl-CoA carboxylase beta chain, mitochondrial OS=Homo sapiens GN=MCCC2 PE=1 SV=1 - [MCCB_HUMAN]	MCCC2	0.48	7	29.6	0.59	6	32
Stathmin OS=Homo sapiens GN=STMN1 PE=2 SV=1 - [Q96CE4_HUMAN]	STMN1	0.47	2	36.4	0.61	2	8.1
Olfactomedin-4 OS=Homo sapiens GN=OLFM4 PE=1 SV=1 - [OLFM4_HUMAN]	OLFM4	0.45	33	13	0.39	34	16.4
Thymidine kinase OS=Homo sapiens GN=TK1 PE=2 SV=1 - [B5BU32_HUMAN]	TK1	0.44	4	14.9	0.46	4	9.7
Polymeric immunoglobulin receptor OS=Homo sapiens GN=PIGR PE=1 SV=4 - [PIGR_HUMAN]	PIGR	0.42	12	24	0.41	11	75.6
Dipeptidase 1 OS=Homo sapiens GN=DPEP1 PE=1 SV=3 - [DPEP1_HUMAN]	DPEP1	0.37	2	43.9	0.51	2	69.2
Ribonucleoside-diphosphate reductase subunit M2 (Fragment) OS=Homo sapiens GN=RRM2 PE=4 SV=1 - [C9JXC1_HUMAN]	RRM2	0.33	2	6.5	0.36	2	2
cDNA FLJ51266, highly similar to Vitronectin OS=Homo sapiens PE=2 SV=1 - [B7Z553_HUMAN]	VTN	0.02	2	95.3	0.02	2	95.3
Protein AATF OS=Homo sapiens GN=AATF PE=1 SV=1 - [AATF_HUMAN]	AATF	0.01	3	53.1	0.01	2	25.3
Alpha-2-HS-glycoprotein OS=Homo sapiens GN=AHSG PE=1 SV=1 - [FETUA_HUMAN]	AHSG	0.01	2	0	0.01	2	0
Keratinocyte proline-rich protein OS=Homo sapiens GN=KPRP PE=1 SV=1 - [KPRP_HUMAN]	KPRP	0.01	3	0	0.01	3	0
Keratin, type I cytoskeletal 10 OS=Homo sapiens GN=KRT10 PE=1 SV=6 - [K1C10_HUMAN]	KRT10	0.01	23	0	0.01	23	0
Keratin, type II cytoskeletal 2 epidermal OS=Homo sapiens GN=KRT2 PE=1 SV=2 - [K22E_HUMAN]	KRT2	0.01	15	0	0.01	15	0
Keratin, type I cytoskeletal 9 OS=Homo sapiens GN=KRT9 PE=1 SV=3 - [K1C9_HUMAN]	KRT9	0.01	8	0	0.01	8	0
RBM16 protein (Fragment) OS=Homo sapiens GN=RBM16 PE=2 SV=1 - [Q05BU5_HUMAN]	RBM16	0.01	3	0	0.01	3	0
cDNA FLJ53449, highly similar to rRNA methyltransferase 3 (EC 2.1.1.-) OS=Homo sapiens PE=2 SV=1 - [B4DKU3_HUMAN]	MRM3	0.01	2	0	0.01	2	0

## Sheet: S2-pQTL instruments
SNP	Effect allele	Other allele	EAF	Beta	Gene	SE	P-value	Sample size	Chr	Position	Type of pQTL	UniProt ID
rs62143206	T	G	0.2131	0.6828	HNRNPA2B1	0.0276	7.08e-135	3000	19	54326212	trans	P22626
rs4308964	T	C	0.71215	-0.2071	PPT1	0.0306	1.23e-11	3000	1	40444888	cis	P50897
rs7533094	A	G	0.04198	-0.8621	PPT1	0.0603	2.29e-46	3000	1	40559686	cis	P50897
rs3957147	T	C	0.17073	0.2264	PPT1	0.0336	1.7e-11	3000	6	32682135	trans	P50897
rs73165061	A	G	0.20247	0.2693	PPT1	0.0308	2.14e-18	3000	3	165481945	trans	P50897
rs28929474	T	C	0.02269	-0.6448	ARFIP2	0.0833	9.55e-15	3000	14	94844947	trans	P53365
rs111918389	T	C	0.96655	-0.559	IGF2R	0.0686	3.8e-16	3000	6	160368234	cis	P11717
rs117010682	T	C	0.01167	0.853	IGF2R	0.1145	9.33e-14	3000	6	160559348	cis	P11717
rs629849	A	G	0.12935	-0.8992	IGF2R	0.0331	9.55e-163	3000	6	160494409	cis	P11717
rs74511171	T	C	0.07457	0.2943	NUDT16L1	0.0485	1.26e-09	3000	5	25576699	trans	Q9BRJ7
rs2277413	A	G	0.70891	0.34	NUDT16L1	0.0267	3.39e-37	3000	12	9317784	trans	Q9BRJ7
rs34436714	A	C	0.21294	0.5292	GCA	0.0288	1.35e-75	3000	19	54327313	trans	P28799
rs570618	T	G	0.38851	0.1618	NDUFB4	0.0253	1.66e-10	3000	1	196657064	trans	O95168
rs704	A	G	0.46665	0.6326	NDUFB4	0.0221	3.63e-180	3000	17	26694861	trans	O95168
rs35094235	T	G	0.269	-0.6252	AHSG	0.0255	2.04e-132	3000	3	186328951	cis	P02765
rs45444697	C	G	0.77979	-0.1907	SVEP1	0.0297	1.26e-10	3000	1	155034632	trans	Q4LDE5
rs145662369	T	G	0.02355	0.6688	SVEP1	0.082	3.55e-16	3000	1	156873435	trans	Q4LDE5
rs61751937	C	G	0.03003	1.0561	SVEP1	0.0708	2.63e-50	3000	9	113312231	trans	Q4LDE5
rs7043404	T	G	0.66027	0.1714	SVEP1	0.0259	3.55e-11	3000	9	113201276	trans	Q4LDE5
rs45444697	C	G	0.77979	-0.2297	SVEP1	0.0296	7.94e-15	3000	1	155034632	trans	Q4LDE5
rs145662369	T	G	0.02355	0.7006	SVEP1	0.082	1.26e-17	3000	1	156873435	trans	Q4LDE5
rs4387050	C	G	0.50031	0.2111	SVEP1	0.0247	1.23e-17	3000	9	113250289	trans	Q4LDE5
rs61751937	C	G	0.03003	1.1854	SVEP1	0.0702	5.25e-64	3000	9	113312231	trans	Q4LDE5
rs601338	A	G	0.50711	-0.268	GOLM1	0.0241	1.12e-28	3000	19	49206674	trans	O95249
rs550057	T	C	0.24577	0.5503	GOLM1	0.027	3.55e-92	3000	9	136146597	trans	Q8NBJ4
rs62143194	C	G	0.77636	-0.2222	LRP1	0.0305	3.16e-13	3000	19	54319624	trans	Q07954
rs62143197	A	G	0.22311	0.4142	AKT2	0.0296	1.82e-44	3000	19	54320716	trans	P31751

## Sheet: S3-eQTL instruments
SNP	Effect allele	Other allele	EAF	Beta	Gene	SE	P-value	Sample size	Chr	Position	Type of eQTL	Ensembl ID
rs34685	A	G	0.12849	0.621149	AMACR	0.017	1e-200	31684	5	34006203	cis	ENSG00000242110
rs4866385	A	G	0.229941	0.110895	AMACR	0.0141132	3.92e-15	31684	5	33774414	cis	ENSG00000242110
rs71636778	C	T	0.158262	-0.0792106	AMACR	0.0162931	1.16e-06	31569	1	27104612	trans	ENSG00000242110
rs37036	C	NA	0.255665	0.20617	CNOT1	0.0135327	2.08e-52	31430	16	58553348	cis	ENSG00000125107
rs1418922	A	G	0.26857	0.0894771	HELLS	0.0134074	2.5e-11	31355	10	95803595	cis	ENSG00000119969
rs472736	C	G	0.331088	-0.101252	HELLS	0.0126183	1.02e-15	30688	10	96996791	cis	ENSG00000119969
rs576517	A	G	0.399135	0.443868	HELLS	0.0115649	1e-200	31342	10	96139515	cis	ENSG00000119969
rs2524303	A	G	0.436447	0.103609	KRT10	0.0119691	4.87e-18	14251	17	39039025	cis	ENSG00000186395
rs56097758	A	G	0.181871	0.385735	KRT10	0.015084	3.09e-144	14263	17	38986586	cis	ENSG00000186395
rs4947311	C	NA	0.378589	0.0609482	MRPS5	0.01226	6.65e-07	27822	6	31326166	trans	ENSG00000144029
rs113642718	C	G	0.128091	0.10112	NSMCE1	0.017789	1.31e-08	14254	16	27242709	cis	ENSG00000169189
rs7190472	C	T	0.30191	0.111399	NSMCE1	0.0129304	6.98e-18	14262	16	27341553	cis	ENSG00000169189
rs10421561	C	T	0.454283	0.429108	PNKP	0.0113948	1e-200	24078	19	50304392	cis	ENSG00000039650
rs149007767	T	C	0.149708	0.121928	PNKP	0.01665	2.43e-13	29328	7	50370254	trans	ENSG00000039650
rs149110519	T	C	0.0526158	-0.143197	PNKP	0.0266305	7.56e-08	24986	6	144385777	trans	ENSG00000039650
rs16981493	C	T	0.0315762	-0.782562	PNKP	0.033392	1.85e-121	29614	19	50362286	cis	ENSG00000039650
rs35018314	A	C	0.0556924	0.170722	PNKP	0.0259133	4.46e-11	29087	19	50432190	cis	ENSG00000039650
rs4801820	C	A	0.367935	0.0623117	PNKP	0.0123306	4.34e-07	30298	19	50723415	cis	ENSG00000039650
rs10072	C	T	0.335056	0.21503	RCL1	0.0124788	1.54e-66	31684	9	4860964	cis	ENSG00000120158
rs10116352	G	C	0.114681	0.106808	RCL1	0.0186571	1.04e-08	30768	9	4939466	cis	ENSG00000120158
rs10815090	T	C	0.368236	0.0752812	RCL1	0.0123234	1e-09	31558	9	4818167	cis	ENSG00000120158
rs234864	G	A	0.454395	-0.0790786	SLC22A18	0.0119348	3.45e-11	23154	11	2857297	cis	ENSG00000110628
rs367035	G	A	0.412889	-0.509924	SLC22A18	0.0113008	1e-200	21221	11	2923826	cis	ENSG00000110628
rs6421034	C	T	0.203629	0.0808628	SLC22A18	0.0147641	4.33e-08	31557	11	3007647	cis	ENSG00000110628
rs7223672	C	NA	0.286518	0.472853	SMARCD2	0.0125476	1e-200	30606	17	61720565	cis	ENSG00000108604
rs10401193	G	A	0.179995	0.084503	SPINT1	0.0154756	4.75e-08	31684	19	19591066	trans	ENSG00000166145
rs145290340	T	C	0.0226571	-0.319013	SPINT1	0.039906	1.3e-15	28379	15	41971393	cis	ENSG00000166145
rs2594836	G	A	0.250349	0.0830177	SPINT1	0.0137208	1.44e-09	31569	5	173205318	trans	ENSG00000166145
rs8028660	A	C	0.241004	-0.191147	SPINT1	0.0138226	1.71e-43	31560	15	41156120	cis	ENSG00000166145
rs17065406	A	G	0.297817	-0.12798	ZDHHC20	0.0129704	5.78e-23	31013	13	21916420	cis	ENSG00000180776
rs673610	T	C	0.303031	0.0686921	ZDHHC20	0.0129378	1.1e-07	31355	13	21836559	cis	ENSG00000180776
rs7981970	A	G	0.425358	-0.331211	ZDHHC20	0.0117112	5.79e-176	31354	13	22019915	cis	ENSG00000180776
rs1045056	C	T	0.293654	0.227448	AATF	0.0129273	2.72e-69	31075	17	35346641	cis	ENSG00000108270
rs1354034	T	C	0.381863	0.0629739	AATF	0.0122389	2.67e-07	31684	3	56849749	trans	ENSG00000108270
rs1690313	G	C	0.0466521	-0.306573	B2M	0.0281035	1.05e-27	31355	15	45005660	cis	ENSG00000166710
rs142263215	A	G	0.0230776	-0.230843	BUD31	0.039591	5.52e-09	16298	7	99017357	cis	ENSG00000106245
rs2269985	T	C	0.0343069	0.486804	BUD31	0.0324412	6.75e-51	30857	7	99001625	cis	ENSG00000106245
rs2687134	T	G	0.0851411	0.113178	BUD31	0.0213041	1.08e-07	30521	7	99331042	cis	ENSG00000106245
rs35296070	C	T	0.0353918	-0.288083	BUD31	0.0321206	2.99e-19	27778	7	99057341	cis	ENSG00000106245
rs6684514	A	G	0.287248	0.0681317	BUD31	0.0131412	2.16e-07	31298	1	156255456	trans	ENSG00000106245
rs114379358	C	T	0.158029	0.326361	C2orf43	0.0160836	1.53e-91	31567	2	20915248	cis	ENSG00000118961
rs116064673	A	G	0.020346	-0.310578	C2orf43	0.0420757	1.56e-13	25767	2	21595312	cis	ENSG00000118961
rs12720820	C	T	0.094418	-0.144848	C2orf43	0.0203176	1.01e-12	31553	2	21239661	cis	ENSG00000118961
rs2241756	T	A	0.406046	0.117394	C2orf43	0.012079	2.51e-22	26942	2	20851608	cis	ENSG00000118961
rs9306894	G	A	0.369706	-0.543998	C2orf43	0.0114477	1e-200	31569	2	20878105	cis	ENSG00000118961
rs10278051	T	C	0.338946	-0.117757	C7orf50	0.0125345	5.74e-21	31355	7	1181139	cis	ENSG00000146540
rs10282027	A	G	0.0266877	0.185798	C7orf50	0.0368955	4.76e-07	21562	7	1005018	cis	ENSG00000146540
rs2960834	C	G	0.417727	0.270792	C7orf50	0.0118508	1.46e-115	31566	7	1202956	cis	ENSG00000146540
rs10734456	C	A	0.272976	-0.105464	CD151	0.0133305	2.54e-15	31345	11	1607346	cis	ENSG00000177697
rs10761741	T	G	0.420816	0.0874401	CD151	0.0120331	3.69e-13	31470	10	65066186	trans	ENSG00000177697
rs10876550	G	A	0.409936	-0.0743749	CD151	0.0120852	7.55e-10	31470	12	54712308	trans	ENSG00000177697
rs11653357	A	G	0.17703	0.208216	CD151	0.0154942	3.61e-41	31270	17	33923607	trans	ENSG00000177697
rs1354034	T	C	0.381863	-0.209249	CD151	0.0121231	9.31e-67	31470	3	56849749	trans	ENSG00000177697
rs141283716	A	G	0.0435464	-0.143093	CD151	0.0291384	9.06e-07	23251	11	343859	cis	ENSG00000177697
rs142164066	A	G	0.0891653	0.281207	CD151	0.0207501	7.71e-42	24280	11	547390	cis	ENSG00000177697
rs28490880	A	C	0.294916	0.0633456	CD151	0.013041	1.19e-06	27776	11	1146353	cis	ENSG00000177697
rs3932434	C	T	0.28068	-0.526169	CD151	0.0124835	1e-200	23660	11	751726	cis	ENSG00000177697
rs56321310	T	C	0.157182	-0.113436	CD151	0.0163243	3.68e-12	24771	11	1245298	cis	ENSG00000177697
rs75813514	T	C	0.0740565	-0.597355	CD151	0.0221654	5.7e-160	20680	11	869158	cis	ENSG00000177697
rs117646692	G	A	0.0212424	0.261918	CHAF1B	0.0412178	2.09e-10	11496	21	37791997	cis	ENSG00000159259
rs55908509	A	G	0.3284	-0.0645829	CHAF1B	0.0126616	3.38e-07	6336	19	16442019	trans	ENSG00000159259
rs10149470	A	G	0.487575	-0.312358	CKB	0.0116133	2.39e-159	31231	14	104017953	cis	ENSG00000166165
rs10774624	A	G	0.538565	0.0584184	CKB	0.0119289	9.73e-07	28089	12	111833788	trans	ENSG00000166165
rs12485444	T	A	0.490804	0.146894	CKB	0.0118411	2.44e-35	31240	3	188135783	trans	ENSG00000166165
rs1555133	A	G	0.342985	-0.0778943	CKB	0.0125206	4.93e-10	31684	20	31048382	trans	ENSG00000166165
rs2492301	T	C	0.484855	-0.0685887	CKB	0.011895	8.11e-09	31684	1	37939173	trans	ENSG00000166165
rs3732378	A	G	0.165434	-0.112035	CKB	0.01599	2.44e-12	31300	3	39307162	trans	ENSG00000166165
rs4970966	T	G	0.209553	-0.0742562	CKB	0.0146105	3.73e-07	31684	1	150584103	trans	ENSG00000166165
rs6575976	T	C	0.531182	0.109447	CKB	0.0118911	3.45e-20	27059	14	103823243	cis	ENSG00000166165
rs6929796	A	G	0.166467	-0.155764	CKB	0.015924	1.35e-22	30987	6	31522669	trans	ENSG00000166165
rs73204034	T	C	0.0928617	0.143827	CKB	0.0204706	2.13e-12	31569	12	116839021	trans	ENSG00000166165
rs8026803	C	T	0.247924	-0.224875	CKB	0.0136528	5.93e-61	31684	15	80260014	trans	ENSG00000166165
rs913672	G	T	0.340707	0.0740188	CKB	0.0125424	3.6e-09	31569	20	48906967	trans	ENSG00000166165
rs913678	C	T	0.306921	-0.0693459	CKB	0.0128913	7.47e-08	31300	20	48955424	trans	ENSG00000166165
rs112293672	T	C	0.0269882	0.348502	CLPTM1	0.0366108	1.75e-21	11820	19	45508351	cis	ENSG00000104853
rs118060185	A	G	0.0303551	0.296869	CLPTM1	0.0346014	9.52e-18	20633	19	45431674	cis	ENSG00000104853
rs1354034	T	C	0.381863	0.0761905	CLPTM1	0.0122335	4.73e-10	30935	3	56849749	trans	ENSG00000104853
rs1053700	G	A	0.137484	0.530512	COX20	0.0166968	1e-200	25575	1	245006827	cis	ENSG00000203667
rs11579106	T	C	0.0131175	-0.36981	COX20	0.0522175	1.42e-12	10478	1	245008115	cis	ENSG00000203667
rs10098310	G	A	0.424993	0.0896423	CYP27A1	0.0120161	8.65e-14	31569	8	130613614	trans	ENSG00000135929
rs111778408	A	G	0.100785	-0.16727	CYP27A1	0.0197202	2.21e-17	30165	14	35572163	trans	ENSG00000135929
rs11881751	A	G	0.231675	0.0698011	CYP27A1	0.0140947	7.34e-07	31569	19	4997420	trans	ENSG00000135929
rs11920354	A	C	0.372903	0.0651811	CYP27A1	0.0122955	1.15e-07	28917	3	47262246	trans	ENSG00000135929
rs13333054	T	C	0.211395	0.0854234	CYP27A1	0.0145592	4.43e-09	31684	16	86011033	trans	ENSG00000135929
rs138857	T	C	0.216154	-0.0812743	CYP27A1	0.0144431	1.83e-08	30614	22	50199589	trans	ENSG00000135929
rs145656295	C	T	0.0170543	-0.264552	CYP27A1	0.0459148	8.32e-09	26272	2	218912646	cis	ENSG00000135929
rs149007767	T	C	0.149708	-0.285276	CYP27A1	0.0165079	6.5e-67	30077	7	50370254	trans	ENSG00000135929
rs149110519	T	C	0.0526158	-0.199104	CYP27A1	0.026605	7.22e-14	25735	6	144385777	trans	ENSG00000135929
rs16936870	A	T	0.113177	0.104551	CYP27A1	0.018766	2.53e-08	31569	8	71189342	trans	ENSG00000135929
rs174551	C	T	0.315191	0.0605428	CYP27A1	0.0128006	2.25e-06	27314	11	61573684	trans	ENSG00000135929
rs17838642	C	A	0.0343517	0.19779	CYP27A1	0.032636	1.36e-09	27563	2	219023532	cis	ENSG00000135929
rs2594836	G	A	0.250349	-0.0740283	CYP27A1	0.0137244	6.89e-08	31569	5	173205318	trans	ENSG00000135929
rs2846630	A	G	0.414408	0.0655408	CYP27A1	0.0120692	5.63e-08	31684	11	113957197	trans	ENSG00000135929
rs35979828	T	C	0.0571059	-0.222816	CYP27A1	0.0255805	3.02e-18	29836	12	54685880	trans	ENSG00000135929
rs3733018	A	C	0.35857	-0.082349	CYP27A1	0.0123909	3.01e-11	31355	3	187456594	trans	ENSG00000135929
rs3770211	T	G	0.361946	0.670921	CYP27A1	0.0110225	1e-200	24245	2	219269729	cis	ENSG00000135929
rs3774937	C	T	0.320593	0.0696772	CYP27A1	0.0127392	4.52e-08	31569	4	103434253	trans	ENSG00000135929
rs56388170	T	G	0.289189	0.0901141	CYP27A1	0.0131054	6.16e-12	31355	7	28724374	trans	ENSG00000135929
rs6701752	G	A	0.0966068	-0.1153	CYP27A1	0.0201232	1.01e-08	31569	1	236102886	trans	ENSG00000135929
rs6782228	C	G	0.273721	-0.0829446	CYP27A1	0.0133304	4.9e-10	31569	3	128323424	trans	ENSG00000135929
rs7212590	T	C	0.0900785	-0.207595	CYP27A1	0.0207154	1.23e-23	31569	17	57885709	trans	ENSG00000135929
rs72951800	G	A	0.11636	0.16711	CYP27A1	0.0185078	1.73e-19	31566	2	220005411	cis	ENSG00000135929
rs730775	G	A	0.433528	0.0721914	CYP27A1	0.0119947	1.76e-09	24632	6	44232074	trans	ENSG00000135929
rs74480102	A	G	0.0309155	-0.180526	CYP27A1	0.034352	1.48e-07	26244	17	7742601	trans	ENSG00000135929
rs7558110	C	T	0.0545784	0.709485	CYP27A1	0.0255116	3.27e-170	31569	2	219624728	cis	ENSG00000135929
rs77299947	C	T	0.0147949	0.2718	CYP27A1	0.0492444	3.41e-08	16802	2	219699177	cis	ENSG00000135929
rs111692241	C	G	0.23941	-0.60005	DHFR	0.013001	1e-200	6083	5	79895438	cis	ENSG00000228716
rs115915237	G	A	0.0221069	0.312186	DHFR	0.0403941	1.09e-14	6421	5	79756292	cis	ENSG00000228716
rs166061	T	C	0.194284	0.0866466	DHFR	0.0150253	8.09e-09	6411	5	80441588	cis	ENSG00000228716
rs249008	A	G	0.31767	-0.162433	DHFR	0.0127105	2.13e-37	6083	5	79805765	cis	ENSG00000228716
rs13330176	A	T	0.21644	-0.0834793	DPYSL2	0.0144353	7.33e-09	31240	16	86019087	trans	ENSG00000092964
rs1375493	G	A	0.434923	-0.124277	DPYSL2	0.01196	2.72e-25	31569	2	182323766	trans	ENSG00000092964
rs149007767	T	C	0.149708	-0.10078	DPYSL2	0.01666	1.46e-09	30077	7	50370254	trans	ENSG00000092964
rs1892548	T	C	0.361419	0.0646816	DPYSL2	0.0123769	1.73e-07	31684	13	41002641	trans	ENSG00000092964
rs2239630	A	G	0.480827	-0.083956	DPYSL2	0.0118913	1.66e-12	31569	14	23589349	trans	ENSG00000092964
rs55793580	T	C	0.169838	-0.0971852	DPYSL2	0.0158295	8.27e-10	31569	9	127009395	trans	ENSG00000092964
rs55848744	T	C	0.0171946	-0.327526	DPYSL2	0.0457011	7.68e-13	26070	8	26391084	cis	ENSG00000092964
rs56330463	T	C	0.417903	-0.0599171	DPYSL2	0.0120567	6.7e-07	31569	5	148200011	trans	ENSG00000092964
rs597808	G	A	0.52377	0.0775012	DPYSL2	0.0118991	7.37e-11	28089	12	111973358	trans	ENSG00000092964
rs62569723	G	A	0.205979	0.0817073	DPYSL2	0.0147008	2.73e-08	31569	9	113936919	trans	ENSG00000092964
rs7009085	A	G	0.123398	0.205104	DPYSL2	0.0180137	4.91e-30	31684	8	26437688	cis	ENSG00000092964
rs17342717	T	C	0.0753918	-0.118361	EIF1B	0.0225206	1.47e-07	14263	6	25821770	trans	ENSG00000114784
rs3811444	T	C	0.337611	-0.0666307	EIF1B	0.0125733	1.16e-07	14263	1	248039451	trans	ENSG00000114784
rs56841336	A	G	0.333082	-0.0923721	EIF1B	0.012604	2.32e-13	14255	3	40336671	cis	ENSG00000114784
rs6592965	A	G	0.449532	0.111757	EIF1B	0.0119276	7.28e-21	14263	7	50427982	trans	ENSG00000114784
rs79755767	A	G	0.0977363	-0.101591	EIF1B	0.0200242	3.91e-07	13438	12	54698408	trans	ENSG00000114784
rs8073060	A	T	0.305723	-0.0826762	EIF1B	0.0128998	1.46e-10	14263	17	33875262	trans	ENSG00000114784
rs10792318	G	A	0.219622	0.517269	FADS2	0.0137014	1e-200	29863	11	61531443	cis	ENSG00000134824
rs17708945	A	T	0.0199012	-0.237381	FADS2	0.0425688	2.45e-08	25312	11	61942029	cis	ENSG00000134824
rs2521572	T	G	0.0480594	0.412208	FADS2	0.0276088	2.1e-50	31141	11	61711475	cis	ENSG00000134824
rs34790965	G	T	0.0321109	-0.227582	FADS2	0.0337059	1.46e-11	27766	11	61767560	cis	ENSG00000134824
rs76376981	C	G	0.047191	0.561297	FADS2	0.0276676	1.68e-91	6855	11	61418816	cis	ENSG00000134824
rs7942717	G	A	0.077934	0.191103	FADS2	0.0221441	6.14e-18	28259	11	61647288	cis	ENSG00000134824
rs141795078	T	C	0.020967	0.217601	FAM134C	0.0415007	1.58e-07	6391	17	40778229	cis	ENSG00000141699
rs145566587	T	C	0.0452804	0.168933	FAM134C	0.0285901	3.45e-09	28308	17	40649936	cis	ENSG00000141699
rs78345139	C	T	0.0472113	-0.376017	FAM134C	0.0278832	1.91e-41	29836	17	40731661	cis	ENSG00000141699
rs7594645	G	A	0.0548992	-0.239755	FASTKD2	0.0260509	3.47e-20	31569	2	207646674	cis	ENSG00000118246
rs76270461	A	G	0.103931	0.12002	FASTKD2	0.0194768	7.18e-10	31684	2	207653653	cis	ENSG00000118246
rs1265065	C	T	0.020626	-0.254598	FLOT1	0.0418209	1.14e-09	6609	6	31077724	cis	ENSG00000137312
rs139747027	T	C	0.176118	-0.124476	FLOT1	0.0155895	1.41e-15	2337	6	30216186	cis	ENSG00000137312
rs143299380	T	C	0.017972	-0.230024	FLOT1	0.0447588	2.76e-07	4946	6	30598244	cis	ENSG00000137312
rs149110519	T	C	0.0526158	-0.304036	FLOT1	0.0265346	2.14e-30	5511	6	144385777	trans	ENSG00000137312
rs3094222	G	A	0.112029	0.445659	FLOT1	0.0184938	2.65e-128	8489	6	31081434	cis	ENSG00000137312
rs7210990	A	C	0.481977	0.0594085	FLOT1	0.0119007	5.98e-07	9188	17	16170764	trans	ENSG00000137312
rs77526211	A	G	0.0432109	-0.157233	FLOT1	0.0292412	7.57e-08	9188	13	40974023	trans	ENSG00000137312
rs72723192	T	C	0.167055	0.229274	GCLM	0.0158382	1.72e-47	31191	1	94389345	cis	ENSG00000023909
rs11882319	A	C	0.140618	-0.395569	GIPC1	0.0167942	1.14e-122	31017	19	14616371	cis	ENSG00000123159
rs2241360	T	C	0.181358	0.160882	GIPC1	0.015387	1.38e-25	27063	19	14586015	cis	ENSG00000123159
rs8113491	T	C	0.461385	0.064374	GIPC1	0.0119269	6.77e-08	31470	19	14751929	cis	ENSG00000123159
rs12485738	A	G	0.360123	0.0589277	GIT1	0.0123886	1.97e-06	31300	3	56865776	trans	ENSG00000108262
rs185741477	A	G	0.0578734	-0.146037	GIT1	0.0254592	9.68e-09	28540	17	27067070	cis	ENSG00000108262
rs2292973	A	G	0.438604	-0.523969	GIT1	0.011154	1e-200	31355	17	27893015	cis	ENSG00000108262
rs60975088	C	T	0.157846	-0.142725	GIT1	0.0162799	1.83e-18	31566	17	27776735	cis	ENSG00000108262
rs62065161	G	A	0.0249632	0.236059	GIT1	0.0380973	5.79e-10	25445	17	27430853	cis	ENSG00000108262
rs62070804	T	C	0.0178747	0.275237	GIT1	0.0448604	8.49e-10	11173	17	27889643	cis	ENSG00000108262
rs10201430	C	T	0.322507	-0.322372	HAT1	0.0124403	4.66e-148	31569	2	172813241	cis	ENSG00000128708
rs149148283	A	G	0.0236419	0.30761	HAT1	0.0390884	3.56e-15	28233	2	172490738	cis	ENSG00000128708
rs114144511	C	A	0.0570388	-0.514793	HLA-A	0.0252948	4.48e-92	14523	6	29920930	cis	ENSG00000206503
rs117136783	G	A	0.0254965	-0.294569	HLA-A	0.0376768	5.35e-15	17144	6	30669837	cis	ENSG00000206503
rs150878686	C	T	0.185345	0.141869	HLA-A	0.0152702	1.54e-20	16588	6	29920930	cis	ENSG00000206503
rs1532624	A	C	0.437102	-0.0760086	HLA-A	0.0119817	2.24e-10	25092	16	57005479	trans	ENSG00000206503
rs9259819	G	T	0.517654	-0.481529	HLA-A	0.0112001	1e-200	16880	6	29893575	cis	ENSG00000206503
rs146852891	T	G	0.0190311	-0.228144	HLA-B	0.0435173	1.58e-07	5447	6	32203742	cis	ENSG00000234745
rs1532624	A	C	0.437102	-0.0674525	HLA-B	0.0119854	1.82e-08	8269	16	57005479	trans	ENSG00000234745
rs190473700	A	G	0.0178216	-0.22862	HLA-B	0.0449447	3.64e-07	3835	6	30636360	cis	ENSG00000234745
rs2596496	C	G	0.304776	0.489077	HLA-B	0.012257	1e-200	7571	6	31322782	cis	ENSG00000234745
rs59727727	C	T	0.156483	0.12306	HLA-B	0.0163491	5.2e-14	7567	6	31329797	cis	ENSG00000234745
rs9266086	T	C	0.0901542	-0.376751	HLA-B	0.0205377	3.66e-75	7565	6	31320263	cis	ENSG00000234745
rs11743633	G	A	0.47359	0.0736738	HMGCS1	0.011904	6.06e-10	26524	5	43351682	cis	ENSG00000112972
rs174547	C	T	0.330181	0.0634869	HMGCS1	0.0126445	5.15e-07	31300	11	61570783	trans	ENSG00000112972
rs3732378	A	G	0.165434	-0.0942832	HMGCS1	0.0159981	3.78e-09	31300	3	39307162	trans	ENSG00000112972
rs2868371	G	C	0.248726	-0.12493	HSPB1	0.0137282	9e-20	14258	7	75930759	cis	ENSG00000106211
rs111383277	A	G	0.022969	0.368359	JUP	0.0396089	1.41e-20	24038	17	39768820	cis	ENSG00000173801
rs116690895	T	C	0.0265696	0.456031	JUP	0.0368088	2.99e-35	30189	17	40324798	cis	ENSG00000173801
rs117120730	G	A	0.0160991	0.421495	JUP	0.0471566	3.96e-19	5434	17	40498442	cis	ENSG00000173801
rs117366719	A	G	0.0157881	-0.257709	JUP	0.0476966	6.55e-08	23167	17	40113958	cis	ENSG00000173801
rs117981684	A	G	0.019187	-0.349801	JUP	0.0432858	6.4e-16	28317	17	40113010	cis	ENSG00000173801
rs12478601	C	T	0.425396	-0.0754469	JUP	0.0120215	3.47e-10	30802	2	43721508	trans	ENSG00000173801
rs12485444	T	A	0.490804	-0.0735905	JUP	0.0118894	6.03e-10	30742	3	88135783	trans	ENSG00000173801
rs138960999	A	G	0.019883	1.53478	JUP	0.0406306	1e-200	13806	17	39939982	cis	ENSG00000173801
rs141225818	A	G	0.0181532	0.304144	JUP	0.0445071	8.28e-12	12374	17	40360811	cis	ENSG00000173801
rs145907332	A	G	0.012641	0.570062	JUP	0.0530577	6.31e-27	8069	17	40189847	cis	ENSG00000173801
rs149858330	A	G	0.0274116	-0.194384	JUP	0.0364145	9.39e-08	16488	17	40056592	cis	ENSG00000173801
rs150902993	G	A	0.0240162	-0.643509	JUP	0.0384959	9.96e-63	25084	17	39909401	cis	ENSG00000173801
rs34684777	A	G	0.0214574	1.8176	JUP	0.0381184	1e-200	23670	17	40010070	cis	ENSG00000173801
rs3774937	C	T	0.320593	0.0880576	JUP	0.0127312	4.63e-12	31071	4	103434253	trans	ENSG00000173801
rs55919561	A	G	0.0182104	0.313501	JUP	0.0444335	1.72e-12	23330	17	39911143	cis	ENSG00000173801
rs72820838	T	C	0.0399153	-0.315071	JUP	0.0302874	2.41e-25	29151	17	40113631	cis	ENSG00000173801
rs680447	C	A	0.339315	-0.198299	KRT2	0.012459	4.89e-57	31683	12	53006138	cis	ENSG00000172867
rs7958317	A	G	0.21751	0.0691094	KRT2	0.0144149	1.63e-06	31568	12	52984208	cis	ENSG00000172867
rs2013208	C	T	0.469446	-0.0575005	LAMP2	0.011916	1.4e-06	9188	3	50129399	trans	ENSG00000005893
rs56388170	T	G	0.289189	0.0725732	LAMP2	0.0131131	3.13e-08	9188	7	28724374	trans	ENSG00000005893
rs643381	C	A	0.498745	-0.0763046	LGALS3	0.0118862	1.37e-10	30757	6	139839423	trans	ENSG00000131981
rs6592965	A	G	0.449532	0.0966698	LGALS3	0.0119369	5.58e-16	31470	7	50427982	trans	ENSG00000131981
rs7141706	G	C	0.0934347	-0.151577	LGALS3	0.02041	1.11e-13	30633	14	55686601	cis	ENSG00000131981
rs13407676	T	C	0.0886719	0.103818	LPIN1	0.0209187	6.95e-07	31346	2	12372972	cis	ENSG00000134324
rs139780468	C	A	0.0170155	-0.3529	LPIN1	0.0459243	1.54e-14	24998	2	11969921	cis	ENSG00000134324
rs145998232	T	C	0.026437	-0.18871	LPIN1	0.0370645	3.55e-07	27657	2	12030180	cis	ENSG00000134324
rs3792032	A	G	0.0600429	-0.12288	LPIN1	0.0250316	9.15e-07	31198	2	11771950	cis	ENSG00000134324
rs4669781	T	C	0.0462919	0.698743	LPIN1	0.0277086	2.58e-140	30209	2	11943082	cis	ENSG00000134324
rs653178	T	C	0.539991	-0.0786479	LPIN1	0.0119234	4.22e-11	28418	12	112007756	trans	ENSG00000134324
rs6731096	G	A	0.442144	-0.490027	LPIN1	0.0112518	1e-200	31684	2	11887435	cis	ENSG00000134324
rs80009615	T	C	0.0232384	0.439324	LPIN1	0.0393311	5.73e-29	30507	2	11989363	cis	ENSG00000134324
rs1042602	A	C	0.324933	-0.0589299	MCCC2	0.0126982	3.47e-06	14263	11	88911696	trans	ENSG00000131844
rs6867067	G	T	0.0741941	-0.113767	MCCC2	0.0226889	5.33e-07	13100	5	70969370	cis	ENSG00000131844
rs74693884	C	G	0.4547	0.192308	MCCC2	0.0118425	2.69e-59	14259	5	70775975	cis	ENSG00000131844
rs143960153	A	C	0.0121359	0.457667	MCM2	0.0542208	3.15e-17	7828	3	127171585	cis	ENSG00000073111
rs9819775	C	T	0.0208428	0.202308	MCM2	0.0416272	1.17e-06	27049	3	127784379	cis	ENSG00000073111
rs2073036	C	T	0.48837	-0.202083	MCM3	0.0117846	6.48e-66	31086	6	52144081	cis	ENSG00000112118
rs4712003	T	C	0.259777	-0.0751687	MCM3	0.0135578	2.95e-08	31353	6	52224245	cis	ENSG00000112118
rs12544708	C	T	0.0888605	-0.114178	MCM4	0.0208948	4.64e-08	30688	8	49844989	cis	ENSG00000104738
rs4873292	T	C	0.321582	-0.189855	MCM4	0.0126418	5.58e-51	30688	8	48316140	cis	ENSG00000104738
rs10187402	G	C	0.296486	0.571765	MCM6	0.0121107	1e-200	24487	2	135771974	cis	ENSG00000076003
rs1532331	G	T	0.316115	-0.0670305	MCM6	0.0127882	1.59e-07	31470	5	43116830	trans	ENSG00000076003
rs543721	T	G	0.394998	0.0680279	MCM6	0.0121615	2.22e-08	31132	2	137161557	cis	ENSG00000076003
rs12144094	G	C	0.143658	0.0848985	MICAL1	0.0169539	5.51e-07	26494	1	120264823	trans	ENSG00000135596
rs148007941	A	G	0.0179184	0.462859	MICAL1	0.0446969	3.96e-25	21570	6	109907877	cis	ENSG00000135596
rs149007767	T	C	0.149708	0.19425	MICAL1	0.0166013	1.26e-31	25002	7	50370254	trans	ENSG00000135596
rs149110519	T	C	0.0526158	0.197941	MICAL1	0.0266056	1.01e-13	20660	6	144385777	trans	ENSG00000135596
rs17052438	A	T	0.0621622	0.222143	MICAL1	0.024579	1.6e-19	3330	6	110116606	cis	ENSG00000135596
rs2267407	A	G	0.240931	-0.0717294	MICAL1	0.0139043	2.49e-07	26494	22	39747050	trans	ENSG00000135596
rs34292461	T	C	0.259068	-0.539523	MICAL1	0.0128031	1e-200	26493	6	109673480	cis	ENSG00000135596
rs34856868	A	G	0.0245314	-0.185131	MICAL1	0.0384432	1.47e-06	19733	1	92554283	trans	ENSG00000135596
rs4727027	G	A	0.360903	0.0643446	MICAL1	0.0123809	2.03e-07	26110	7	148869277	trans	ENSG00000135596
rs7210990	A	C	0.481977	-0.0627106	MICAL1	0.0118995	1.36e-07	26494	17	16170764	trans	ENSG00000135596
rs72948758	T	C	0.0360327	0.305838	MICAL1	0.0318309	7.4e-22	24450	6	110247327	cis	ENSG00000135596
rs78675901	A	G	0.0142291	0.379296	MICAL1	0.0501522	3.94e-14	13880	6	109523025	cis	ENSG00000135596
rs1056014	A	G	0.0557078	0.752175	MKI67IP	0.0251656	2.75e-196	26280	2	122484976	cis	ENSG00000155438
rs11685074	A	G	0.0417447	0.150403	MKI67IP	0.029731	4.22e-07	26159	2	121959869	cis	ENSG00000155438
rs79864723	A	G	0.0278648	-0.211724	MKI67IP	0.0361181	4.57e-09	17549	2	122461643	cis	ENSG00000155438
rs12974711	C	T	0.0629954	0.126888	MPP1	0.0244741	2.17e-07	9188	19	11297258	trans	ENSG00000130830
rs149007767	T	C	0.149708	0.106734	MPP1	0.0166574	1.48e-10	8025	7	50370254	trans	ENSG00000130830
rs7968440	G	A	0.346016	0.0611874	MPP1	0.012501	9.86e-07	9188	12	51134741	trans	ENSG00000130830
rs6788205	A	G	0.0825281	0.17806	MRPL47	0.0215775	1.56e-16	26280	3	179330599	cis	ENSG00000136522
rs1131017	C	G	0.399241	-0.0682213	NDUFA4	0.0121392	1.91e-08	31684	12	56435929	trans	ENSG00000189043
rs1354034	T	C	0.381863	-0.0629153	NDUFA4	0.0122389	2.74e-07	31684	3	56849749	trans	ENSG00000189043
rs6961269	A	C	0.411398	0.0828596	NDUFA4	0.0120748	6.78e-12	31553	7	10979918	cis	ENSG00000189043
rs11090046	C	T	0.0940344	-0.121745	NDUFA6	0.0203656	2.26e-09	22548	22	41769083	cis	ENSG00000184983
rs1354034	T	C	0.381863	-0.0811607	NDUFA6	0.0122313	3.23e-11	26410	3	56849749	trans	ENSG00000184983
rs143256776	A	G	0.024178	1.43471	NDUFA6	0.0368182	1e-200	25371	22	42262411	cis	ENSG00000184983
rs55715427	C	G	0.0841856	-0.373292	NDUFA6	0.0212034	2.24e-69	24051	22	42458827	cis	ENSG00000184983
rs76277210	A	G	0.025635	-0.372001	NDUFA6	0.0375285	3.67e-23	21276	22	42447531	cis	ENSG00000184983
rs8073060	A	T	0.305723	-0.0651155	NDUFA6	0.0129069	4.54e-07	25911	17	33875262	trans	ENSG00000184983
rs147337504	A	G	0.0166898	0.313919	NUSAP1	0.0463842	1.31e-11	12984	15	41035099	cis	ENSG00000137804
rs28458941	A	G	0.241535	0.172417	NUSAP1	0.0138296	1.13e-35	31354	15	41667626	cis	ENSG00000137804
rs76388273	G	A	0.0203058	0.262767	NUSAP1	0.0421398	4.5e-10	17419	15	41977150	cis	ENSG00000137804
rs10086568	A	G	0.319855	-0.0804053	OLFM4	0.0127425	2.79e-10	31355	8	6900336	trans	ENSG00000102837
rs1012068	G	T	0.276034	-0.110928	OLFM4	0.0132811	6.69e-17	31086	22	32265903	trans	ENSG00000102837
rs11684404	C	T	0.343776	-0.0723053	OLFM4	0.0125161	7.6e-09	31355	2	88924622	trans	ENSG00000102837
rs117821899	C	T	0.0242877	0.218528	OLFM4	0.0386187	1.53e-08	25921	13	53387401	cis	ENSG00000102837
rs11881751	A	G	0.231675	0.132196	OLFM4	0.014063	5.45e-21	31355	19	4997420	trans	ENSG00000102837
rs12466022	A	C	0.260124	0.0711992	OLFM4	0.0135535	1.49e-07	27185	2	43359061	trans	ENSG00000102837
rs13289095	T	G	0.119513	0.251897	OLFM4	0.0182245	1.88e-43	28373	9	131466489	trans	ENSG00000102837
rs1375493	G	A	0.434923	-0.0919538	OLFM4	0.0119806	1.65e-14	31355	2	182323766	trans	ENSG00000102837
rs138857	T	C	0.216154	0.0775197	OLFM4	0.0144446	8.02e-08	30400	22	50199589	trans	ENSG00000102837
rs17552047	A	G	0.277626	-0.749493	OLFM4	0.0116976	1e-200	31141	13	53602462	cis	ENSG00000102837
rs2227901	A	G	0.203258	-0.110238	OLFM4	0.0147606	8.12e-14	31470	4	57798189	trans	ENSG00000102837
rs2298235	G	A	0.0408581	0.195787	OLFM4	0.03002	6.95e-11	29544	13	53623829	cis	ENSG00000102837
rs3735485	A	G	0.162786	0.101227	OLFM4	0.0160994	3.23e-10	30757	7	45009341	trans	ENSG00000102837
rs479777	C	T	0.343651	0.0647451	OLFM4	0.0125201	2.33e-07	31355	11	64107477	trans	ENSG00000102837
rs61950298	G	A	0.0498663	-0.169491	OLFM4	0.0273059	5.39e-10	30660	13	54037784	cis	ENSG00000102837
rs629326	G	T	0.37219	0.104974	OLFM4	0.0122808	1.26e-17	31355	6	159496713	trans	ENSG00000102837
rs6701752	G	A	0.0966068	-0.0964099	OLFM4	0.0201303	1.67e-06	31355	1	236102886	trans	ENSG00000102837
rs73192429	G	A	0.0902928	0.289055	OLFM4	0.0206237	1.25e-44	29863	13	53518625	cis	ENSG00000102837
rs7846314	T	A	0.178349	-0.0791411	OLFM4	0.0155334	3.49e-07	31355	8	61650831	trans	ENSG00000102837
rs9314614	C	G	0.471273	-0.070012	OLFM4	0.0119086	4.12e-09	31355	8	6697731	trans	ENSG00000102837
rs9527099	C	A	0.307402	0.120852	OLFM4	0.0128587	5.54e-21	31354	13	54113086	cis	ENSG00000102837
rs1007486	C	T	0.35037	-0.12808	OSBPL8	0.0124285	6.66e-25	14263	12	76574376	cis	ENSG00000091039
rs10862951	G	A	0.279231	-0.0685812	OSBPL8	0.0132542	2.29e-07	14248	12	77404522	cis	ENSG00000091039
rs142146836	G	A	0.298265	-0.0630106	OSBPL8	0.0129986	1.25e-06	11158	12	76516732	cis	ENSG00000091039
rs1477749	T	C	0.435172	0.139522	OSBPL8	0.0119472	1.65e-31	14263	12	77119849	cis	ENSG00000091039
rs4761338	T	A	0.153325	0.75146	OSBPL8	0.01526	1e-200	14252	12	76956513	cis	ENSG00000091039
rs1704157	C	NA	0.34099	0.263919	PDS5A	0.0123572	3.34e-101	31353	4	40057289	cis	ENSG00000121892
rs28612101	G	NA	0.413823	0.0603815	PDS5A	0.0120736	5.7e-07	29862	4	39802405	cis	ENSG00000121892
rs148015804	A	G	0.0194749	0.225387	POLD2	0.0430285	1.62e-07	7792	7	44101939	cis	ENSG00000106628
rs3087369	C	T	0.0136604	-0.270441	POLD2	0.0512238	1.29e-07	9125	7	44154286	cis	ENSG00000106628
rs79902400	T	C	0.0146008	-0.575456	POLD2	0.0493823	2.21e-31	12565	7	44178393	cis	ENSG00000106628
rs1043606	C	NA	0.201196	0.230107	POLDIP3	0.0147193	4.35e-55	27399	22	42981678	cis	ENSG00000100227
rs117098413	G	A	0.0379559	0.163784	PPP4C	0.0311158	1.41e-07	15271	16	30746026	cis	ENSG00000149923
rs12596543	G	A	0.457155	-0.274661	PPP4C	0.0117216	2.02e-121	26292	16	30029135	cis	ENSG00000149923
rs149110519	T	C	0.0526158	-0.133445	PPP4C	0.0266341	5.43e-07	20501	6	144385777	trans	ENSG00000149923
rs2594836	G	A	0.250349	-0.0787854	PPP4C	0.0137226	9.39e-09	26295	5	173205318	trans	ENSG00000149923
rs10098310	G	A	0.424993	0.0722472	PTGFRN	0.0120244	1.87e-09	31315	8	130613614	trans	ENSG00000134247
rs12130298	C	A	0.0868471	-0.42055	PTGFRN	0.0208361	1.36e-90	25288	1	117544331	cis	ENSG00000134247
rs12566708	G	A	0.113651	0.121557	PTGFRN	0.0187244	8.48e-11	31420	1	117499648	cis	ENSG00000134247
rs198811	C	T	0.375305	-0.0584159	PTGFRN	0.012282	1.97e-06	31430	6	26128446	trans	ENSG00000134247
rs75567925	A	G	0.0172676	0.233146	PTGFRN	0.0456468	3.27e-07	5270	1	117523707	cis	ENSG00000134247
rs11627485	C	T	0.426962	0.0565785	RAD23A	0.0120231	2.53e-06	31569	14	65487694	trans	ENSG00000179262
rs116979562	A	G	0.0290472	-0.169164	RAD23A	0.0354114	1.78e-06	20096	7	100414147	trans	ENSG00000179262
rs1354034	T	C	0.381863	0.072852	RAD23A	0.012235	2.61e-09	31684	3	56849749	trans	ENSG00000179262
rs147343957	T	C	0.0449656	0.21997	RAD23A	0.028661	1.66e-14	21621	19	13160556	cis	ENSG00000179262
rs17613339	T	C	0.14093	-0.0860749	RAD23A	0.0170899	4.73e-07	31684	1	118139540	trans	ENSG00000179262
rs1864081	G	A	0.3432	-0.0688235	RAD23A	0.0125225	3.89e-08	31561	19	12707978	cis	ENSG00000179262
rs6592965	A	G	0.449532	0.121589	RAD23A	0.0119208	1.99e-24	31684	7	50427982	trans	ENSG00000179262
rs8107930	C	G	0.0383734	0.773411	RAD23A	0.0302916	8.7e-144	31682	19	12972397	cis	ENSG00000179262
rs10774624	A	G	0.538565	0.0596699	RRM2	0.0119285	5.67e-07	6421	12	111833788	trans	ENSG00000171848
rs28488799	A	G	0.164039	0.612311	SLC6A6	0.0152236	1e-200	31017	3	14510317	cis	ENSG00000131389
rs3774937	C	T	0.320593	-0.0600181	SLC6A6	0.0127427	2.48e-06	31569	4	103434253	trans	ENSG00000131389
rs56388170	T	G	0.289189	0.0771388	SLC6A6	0.0131113	4.02e-09	31355	7	28724374	trans	ENSG00000131389
rs6794801	A	G	0.286925	0.100527	SLC6A6	0.0131309	1.92e-14	31683	3	14531382	cis	ENSG00000131389
rs4949373	G	A	0.36638	-0.231794	SNRNP40	0.0121977	1.6e-80	26196	1	31741577	cis	ENSG00000060688
rs13040341	T	A	0.210498	0.0941532	SNRPB2	0.0145782	1.06e-10	31567	20	16617199	cis	ENSG00000125870
rs1555194	G	A	0.371416	-0.147116	SNRPB2	0.0122554	3.38e-33	31684	20	16469782	cis	ENSG00000125870
rs2073055	T	G	0.0742993	-0.747281	SNRPB2	0.0218052	1e-200	28588	20	16710791	cis	ENSG00000125870
rs4814508	T	C	0.499641	-0.143579	SNRPB2	0.011842	7.81e-34	31569	20	16535556	cis	ENSG00000125870
rs113207216	T	C	0.068452	0.241189	ST14	0.0234818	9.5e-25	31018	11	130073630	cis	ENSG00000149418
rs12480732	T	C	0.25385	-0.0643542	ST14	0.0136648	2.48e-06	31355	20	31191015	trans	ENSG00000149418
rs4253772	T	C	0.0999617	0.179007	ST14	0.0197853	1.46e-19	30971	22	46627603	trans	ENSG00000149418
rs7115530	T	G	0.0934775	-0.806756	ST14	0.0192851	1e-200	31354	11	129987727	cis	ENSG00000149418
rs7130579	C	G	0.0541923	-0.182033	ST14	0.0262443	4.03e-12	31350	11	129938457	cis	ENSG00000149418
rs1257156	G	T	0.189805	-0.278233	STMN1	0.0149956	7.51e-77	26493	1	26297984	cis	ENSG00000117632
rs2361763	T	C	0.499144	-0.0608313	STMN1	0.0118925	3.13e-07	31355	16	85993134	trans	ENSG00000117632
rs7310615	G	C	0.537476	0.070907	STMN1	0.0119221	2.72e-09	28418	12	111865049	trans	ENSG00000117632
rs10924772	G	A	0.467906	0.120654	TFB2M	0.0118848	3.25e-24	31430	1	246696596	cis	ENSG00000162851
rs4654270	G	A	0.0462563	0.167134	TFB2M	0.0283014	3.52e-09	29823	1	246642259	cis	ENSG00000162851
rs114618974	A	C	0.0380303	0.313723	TGOLN2	0.0310049	4.58e-24	28583	2	85713741	cis	ENSG00000152291
rs6707822	T	A	0.388614	0.220193	TGOLN2	0.0120689	2.28e-74	25316	2	85615287	cis	ENSG00000152291
rs11592181	A	G	0.142959	-0.141176	TIMM23	0.0169619	8.56e-17	31684	10	51582686	cis	ENSG00000138297
rs79354941	G	C	0.0664875	0.142638	TK1	0.0238597	2.26e-09	23868	17	76175987	cis	ENSG00000167900
rs28745279	A	G	0.156815	-0.0976479	TXNDC9	0.0163471	2.32e-09	25900	2	100018271	cis	ENSG00000115514
rs2033562	G	C	0.376821	0.133124	UBR5	0.0122308	1.37e-27	31355	8	103547739	cis	ENSG00000104517
rs2511710	T	G	0.265704	0.113446	UBR5	0.0134405	3.16e-17	31351	8	103575949	cis	ENSG00000104517
rs35873559	C	T	0.134313	0.271679	UBR5	0.0173039	1.51e-55	31355	8	103366317	cis	ENSG00000104517
rs10897288	A	T	0.312082	0.0800567	UBXN1	0.0128275	4.35e-10	25129	11	62386472	cis	ENSG00000162191
rs13165424	G	A	0.271036	0.0647335	UBXN1	0.0133788	1.31e-06	31684	5	154353012	trans	ENSG00000162191
rs4147593	A	NA	0.491885	-0.112617	UCK2	0.0118673	2.31e-21	31569	1	165600267	cis	ENSG00000143179

## Sheet: S4-pQTL MR
Protein	Instrument	Somamer ID		Method	N SNP	OR	SE	LCI	UCI	P value
ARFIP2	trans pQTL	ARFIP2.12630.8.3		WR	1	1.15	0.06	1.02	1.27	0.03
SVEP1	trans pQTL	SVEP1.11178.21.3		IVW	4	0.97	0.02	0.93	1	0.06
SVEP1	trans pQTL	SVEP1.11109.56.3		IVW	3	0.96	0.02	0.92	1.01	0.09
AKT2	trans pQTL	AKT2.5360.9.2		WR	1	1.04	0.03	0.99	1.1	0.13
LRP1	trans pQTL	LRP1.8601.167.3		WR	1	1.07	0.05	0.97	1.17	0.2
GCA	trans pQTL	GCA.12594.5.3		WR	1	1.03	0.02	0.99	1.07	0.21
HNRNPA2B1	trans pQTL	HNRNPA2B1.5351.52.3		WR	1	1.02	0.02	0.99	1.05	0.21
AHSG	cis pQTL	AHSG.3581.53.3		WR	1	1.02	0.02	0.99	1.05	0.24
PPT1	cis pQTL	PPT1.9244.27.3		IVW	2	0.96	0.04	0.88	1.05	0.39
NDUFB4	trans pQTL	NDUFB4.10677.9.3		IVW	2	1	0.01	0.97	1.02	0.83
PPT1	trans pQTL	PPT1.9244.27.3		IVW	2	1.02	0.11	0.8	1.24	0.85
GOLM1	trans pQTL	GOLM1.8983.7.3		IVW	2	1	0.05	0.91	1.1	0.95
IGF2R	cis pQTL	IGF2R.3676.15.3		IVW	3	1	0.01	0.97	1.03	0.95
NUDT16L1	trans pQTL	NUDT16L1.12497.29.3		IVW	2	1	0.03	0.95	1.05	0.96

## Sheet: S5-eQTL MR
Gene	Method	Type of eQTL	N SNP	OR	LCI	UCI	P value
LPIN1	WR	trans eQTL	1	0.395772	0.316255	0.495283	5.50x10-16
RRM2	WR	trans eQTL	1	3.32547	2.45816	4.49878	6.52x10-15
FADS2	IVW	cis eQTL	6	0.937005	0.904938	0.970208	2.5x10-4
MCM6	IVW	cis eQTL	2	1.08091	1.03229	1.13183	9.23x10-4
POLD2	IVW	cis eQTL	3	0.836379	0.747925	0.935295	1.73x10-3
HLA-A	WR	cis eQTL	1	1.28166	1.04209	1.57632	0.0187491
STMN1	WR	trans eQTL	1	0.720987	0.537762	0.966639	0.0287562
COX20	IVW	cis eQTL	2	0.956521	0.914025	1.00099	0.0552163
CYP27A1	IVW	cis eQTL	6	0.97784	0.953498	1.0028	0.0814423
OLFM4	IVW	cis eQTL	6	1.02278	0.997168	1.04905	0.0817188
NDUFA6	IVW	cis eQTL	4	0.971814	0.940812	1.00384	0.0839061
ZDHHC20	IVW	cis eQTL	3	1.04651	0.993315	1.10256	0.0876371
GIT1	IVW	cis eQTL	5	0.973411	0.942215	1.00564	0.104878
FAM134C	IVW	cis eQTL	3	1.08993	0.981259	1.21064	0.108063
GIT1	WR	trans eQTL	1	0.776583	0.569965	1.0581	0.109122
PDS5A	IVW	cis eQTL	2	1.05614	0.982575	1.13522	0.138123
FLOT1	IVW	trans eQTL	3	0.907633	0.794419	1.03698	0.153935
PTGFRN	IVW	trans eQTL	2	1.14668	0.948389	1.38644	0.157664
KRT2	IVW	cis eQTL	2	1.06256	0.971469	1.1622	0.184505
ST14	IVW	trans eQTL	2	1.10035	0.954519	1.26847	0.187396
MCCC2	WR	trans eQTL	1	0.808871	0.589733	1.10944	0.188245
GIPC1	IVW	cis eQTL	3	1.04573	0.978335	1.11776	0.188329
MCM6	WR	trans eQTL	1	1.21041	0.908829	1.61206	0.191511
CD151	IVW	trans eQTL	4	1.04117	0.97866	1.10767	0.201558
AMACR	IVW	cis eQTL	2	0.972702	0.930956	1.01632	0.216193
PNKP	WR	trans eQTL	1	0.804783	0.560722	1.15507	0.238785
KRT10	IVW	cis eQTL	2	0.966955	0.913272	1.02379	0.248861
BUD31	WR	trans eQTL	1	0.850907	0.643714	1.12479	0.256786
MRPL47	WR	cis eQTL	1	1.11011	0.92167	1.33708	0.271074
SLC6A6	IVW	trans eQTL	2	0.862786	0.663104	1.1226	0.2718
NUSAP1	IVW	cis eQTL	3	0.94763	0.858588	1.04591	0.285306
NDUFA4	IVW	trans eQTL	2	1.10822	0.913566	1.34434	0.297097
HLA-B	IVW	cis eQTL	5	0.953433	0.868027	1.04724	0.319287
DPYSL2	IVW	trans eQTL	9	1.12028	0.894229	1.40346	0.323274
NDUFA6	IVW	trans eQTL	2	1.09181	0.914875	1.30297	0.330179
JUP	IVW	cis eQTL	12	0.985759	0.95622	1.01621	0.355493
B2M	WR	cis eQTL	1	1.06741	0.927952	1.22783	0.361115
HELLS	IVW	cis eQTL	3	1.03054	0.965143	1.10038	0.368428
UBXN1	WR	trans eQTL	1	0.868857	0.636074	1.18683	0.376969
EIF1B	IVW	trans eQTL	6	1.04079	0.950915	1.13915	0.385598
MCM4	IVW	cis eQTL	2	1.04392	0.946818	1.15098	0.388189
LGALS3	WR	cis eQTL	1	1.10111	0.879261	1.37894	0.401424
TGOLN2	WR	cis eQTL	1	1.06074	0.91934	1.22389	0.419171
CD151	IVW	cis eQTL	6	0.974113	0.913863	1.03834	0.420737
MCM2	IVW	cis eQTL	2	0.837759	0.538199	1.30405	0.432979
TXNDC9	WR	cis eQTL	1	0.89805	0.684886	1.17756	0.4367
C2orf43	IVW	cis eQTL	3	1.01292	0.980583	1.04632	0.438125
CNOT1	WR	cis eQTL	1	0.962407	0.872636	1.06141	0.443087
SNRNP40	WR	cis eQTL	1	1.03022	0.95311	1.11356	0.453255
ST14	IVW	cis eQTL	3	0.987225	0.954567	1.021	0.453794
HMGCS1	IVW	trans eQTL	2	0.700889	0.269975	1.8196	0.465288
PNKP	IVW	cis eQTL	5	1.01185	0.978957	1.04585	0.484784
MKI67IP	IVW	cis eQTL	2	1.01791	0.968122	1.07026	0.487801
RAD23A	IVW	cis eQTL	3	1.01971	0.964859	1.07767	0.489062
HAT1	IVW	cis eQTL	2	0.980909	0.928023	1.03681	0.495454
AMACR	WR	trans eQTL	1	1.10488	0.82103	1.48686	0.510324
OLFM4	IVW	trans eQTL	14	1.01922	0.960544	1.08148	0.529142
CLPTM1	WR	trans eQTL	1	0.927918	0.732361	1.17569	0.535544
AATF	WR	trans eQTL	1	0.913462	0.686016	1.21632	0.535544
DHFR	IVW	cis eQTL	4	0.988705	0.953699	1.025	0.53684
GCLM	WR	cis eQTL	1	1.031	0.926512	1.14728	0.575479
DPYSL2	IVW	cis eQTL	2	1.06952	0.844611	1.35431	0.576878
PTGFRN	IVW	cis eQTL	3	1.0257	0.93804	1.12156	0.577677
LPIN1	IVW	cis eQTL	7	0.988335	0.948111	1.03027	0.579926
HLA-A	WR	trans eQTL	1	0.937568	0.743382	1.18248	0.586136
HLA-B	WR	trans eQTL	1	0.929932	0.715938	1.20789	0.586136
SNRPB2	IVW	cis eQTL	4	0.981274	0.910944	1.05703	0.618341
TFB2M	IVW	cis eQTL	2	1.03117	0.910854	1.16739	0.627708
PPP4C	IVW	cis eQTL	2	0.984709	0.924292	1.04908	0.633369
SMARCD2	WR	cis eQTL	1	1.00999	0.969382	1.0523	0.634967
FLOT1	IVW	cis eQTL	3	1.05383	0.845101	1.31411	0.641528
HSPB1	WR	cis eQTL	1	1.03917	0.882724	1.22334	0.644412
RAD23A	IVW	trans eQTL	5	0.978163	0.869394	1.10054	0.713539
CYP27A1	IVW	trans eQTL	20	0.988003	0.924246	1.05616	0.722857
POLDIP3	WR	cis eQTL	1	1.01754	0.921019	1.12417	0.732441
SPINT1	IVW	trans eQTL	2	0.969261	0.810301	1.1594	0.732634
MCCC2	WR	cis eQTL	1	1.04769	0.76044	1.44344	0.775685
MPP1	IVW	trans eQTL	3	0.914355	0.465681	1.79532	0.79479
C7orf50	IVW	cis eQTL	3	1.01634	0.899461	1.1484	0.794864
CKB	IVW	trans eQTL	10	1.02244	0.859236	1.21664	0.802501
OSBPL8	IVW	cis eQTL	5	1.0038	0.973186	1.03538	0.810252
MCM3	IVW	cis eQTL	2	1.01206	0.911864	1.12327	0.821636
CKB	IVW	cis eQTL	2	0.987045	0.880622	1.10633	0.822746
SLC22A18	IVW	cis eQTL	3	1.00699	0.947003	1.07078	0.824009
MICAL1	IVW	cis eQTL	5	0.995124	0.948832	1.04367	0.840606
HMGCS1	WR	cis eQTL	1	0.97719	0.76912	1.24155	0.85018
JUP	IVW	trans eQTL	2	1.03574	0.705387	1.52081	0.857795
FASTKD2	IVW	cis eQTL	2	0.988547	0.86981	1.12349	0.85995
MICAL1	IVW	trans eQTL	7	1.00744	0.922592	1.10009	0.868875
PPP4C	IVW	trans eQTL	2	0.977813	0.74831	1.2777	0.86942
BUD31	IVW	cis eQTL	4	1.00735	0.91139	1.1134	0.886052
LAMP2	IVW	trans eQTL	2	0.985503	0.805475	1.20577	0.887164
LGALS3	IVW	trans eQTL	2	1.00977	0.875558	1.16455	0.893713
SLC6A6	IVW	cis eQTL	2	0.996475	0.942931	1.05306	0.90026
UBR5	IVW	cis eQTL	3	1.00564	0.91965	1.09967	0.901844
CHAF1B	IVW	trans eQTL	2	0.972773	0.611028	1.54868	0.907373
TK1	WR	cis eQTL	1	1.01554	0.777903	1.32578	0.909712
RCL1	IVW	cis eQTL	3	0.996054	0.921233	1.07695	0.920952
NSMCE1	IVW	cis eQTL	2	1.0061	0.872347	1.16035	0.933449
SPINT1	IVW	cis eQTL	2	1.00392	0.911837	1.10531	0.936441
NDUFA4	WR	cis eQTL	1	0.992785	0.802413	1.22832	0.946847
CLPTM1	WR	cis eQTL	1	0.993137	0.747589	1.31934	0.962095
AATF	WR	cis eQTL	1	1.00176	0.922223	1.08816	0.966764
TIMM23	WR	cis eQTL	1	0.997171	0.825598	1.2044	0.976536
STMN1	WR	cis eQTL	1	1	0.924785	1.08133	1

## Sheet: S6-FADS2 and POLD2
Protein	Methods	OR	LCI	UCI	P value
FADS2	Weighted median	0.941709	0.908182	0.976473	1.17x10-3
	Weighted mode	0.941682	0.908108	0.976498	0.0228488
	Simple mode	0.944565	0.891919	1.00032	0.108794
	MR Egger	0.988313	0.894287	1.09222	0.829029
POLD2	Weighted median	0.823728	0.727308	0.932931	2.27x10-3
	Weighted mode	0.820919	0.72253	0.932705	0.0938651
	Simple mode	0.826194	0.702725	0.971357	0.146946
	MR Egger	0.782226	0.591091	1.03517	0.335549
